# Supplementary material for: Prognostic Value of Cancer Stem Cells Markers in Triple-Negative Breast Cancer
Source: Hindawi journal article supplement (doi:10.1155/2015/158682), 2015-01-01
Supplement: f1 [file 158682.f1.pdf]

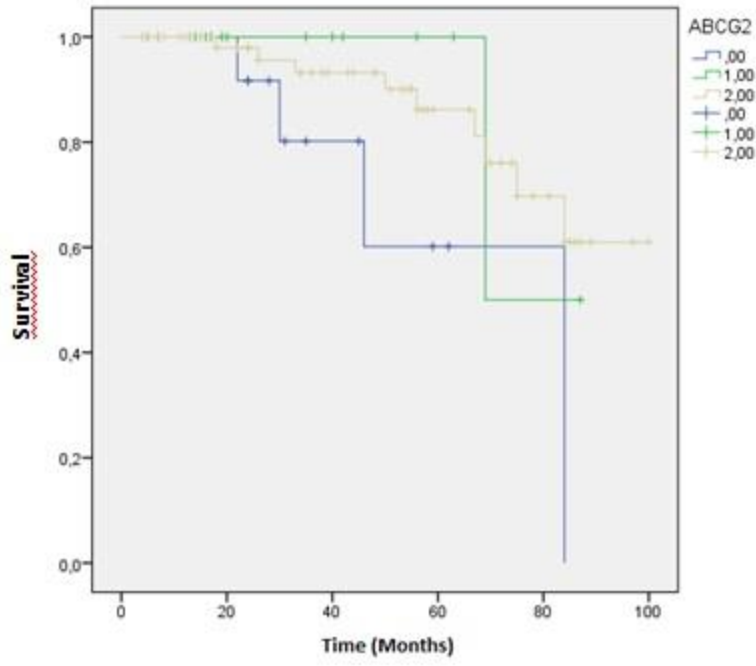

Supplementary Figure 1
